# Supplementary material
Source: ML conference proceedings conference paper supplement (https://openaccess.thecvf.com/content/WACV_2020/html/Ramaswamy_See_the_Sound_WACV_2020_paper.html)
Supplement: Supplementary file 1 [file Ramaswamy_See_the_Sound_WACV_2020_supplemental.pdf]

Archive with 4 entries (3 files):
- 1067-supp/
- 1067-supp/example1_car.mp4
- 1067-supp/1067-supp.pdf
- 1067-supp/example2_helicopter.mp4
